# Supplementary material
Source: PubMed Central journal article supplement (PMC7218796)
Supplement: NIHMS1544022-supplement-1.pdf [file NIHMS1544022-supplement-1.pdf]

## **Detection and Characterization of Mosaicism in Autosomal Dominant Polycystic Kidney Disease (ADPKD)**

Katharina Hopp, Ph.D.<sup>1,2</sup>, Emilie Cornec-Le Gall, M.D., Ph.D.<sup>2,5,6</sup>, Sarah R. Senum<sup>2</sup>, Iris BAW. te Paske, M.Sc.<sup>2</sup>, Sonam Raj, Ph.D.<sup>2</sup>, Sravanthi Lavu, M.B.B.S.<sup>2</sup>, Saurabh Baheti M.S.<sup>3</sup>, Marie E Edwards<sup>2</sup>, Charles D Madsen, C.C.R.P.<sup>2</sup>, Christina M Heyer<sup>2</sup>, Albert CM Ong, D. M.<sup>7</sup>, Kyongtae T. Bae, M.D., Ph.D.<sup>8</sup>, Richard Fatica, M.D.<sup>9</sup>, Theodore I. Steinman, M.D.<sup>10</sup>, Arlene B Chapman, M.D.<sup>11,12</sup>, Berenice Gitomer, Ph.D.<sup>1</sup>, Ronald D Perrone, M.D.<sup>13</sup>, Frederic F Rahbari-Oskoui, M.D.<sup>12</sup>, Vicente E Torres, M.D., Ph.D.<sup>2</sup>, the HALT Progression of Polycystic Kidney Disease Group, the ADPKD Modifier Study, and Peter C Harris, Ph.D.<sup>2,4</sup>

<sup>1</sup>Division of Renal Diseases and Hypertension, University of Colorado Denver Anschutz Medical Campus, Aurora, CO, USA; <sup>2</sup>Division of Nephrology and Hypertension, <sup>3</sup>Division of Biomedical Statistics and Informatics, and <sup>4</sup>Department of Biochemistry and Molecular Biology, Mayo Clinic, Rochester, MN, USA; <sup>5</sup>Department of Nephrology, Centre Hospitalier Universitaire de Brest, Université de Brest, Brest, France, <sup>6</sup>National Institute of Health and Medical Sciences, INSERM U1078, Brest, France; <sup>7</sup>Kidney Genetics Group, Academic Nephrology Unit, University of Sheffield, Sheffield, UK; <sup>8</sup>Department of Radiology, University of Pittsburgh School of Medicine, Pittsburgh, PA, USA, <sup>9</sup>Department of Nephrology and Hypertension, Cleveland Clinic, Cleveland, OH, USA, <sup>10</sup>Renal Division, Beth Israel Deaconess Medical Center, Boston, MA, USA, <sup>11</sup>Division of Nephrology, University of Chicago School of Medicine, Chicago, IL, USA; <sup>12</sup>Department of Internal Medicine, Emory University School of Medicine, Atlanta, GA, USA, <sup>13</sup>Division of Nephrology, Tufts University Medical Center, Boston, MA, USA

Corresponding author: Peter C. Harris, Division of Nephrology and Hypertension, Mayo Clinic, Stable 7, 200 First Street SW, Rochester, MN 55905. Email:

[harris.peter@mayo.edu](mailto:harris.peter@mayo.edu)

## **Supplemental Methods**

### **LR-NGS**

Patient DNA was diluted to 50ng/ $\mu$ l and all exonic regions, and including some introns, of *PKD1/PKD2* were amplified using ten optimized LR-PCR products. Details on primer sequences and PCR conditions can be found in Supplemental Table 1. Each LR-PCR product was analyzed on a 0.5% agarose gel to assure successful specific amplification and subsequently quantified using the Qubit dsDNA BR Assay kit (Invitrogen). All ten amplicons of each patient were pooled equimolarly at 30fM, with the exception of amplicons PKD1\_5UTR-1 and PKD2-5UTR-1, which were enriched 5-fold due to their GC richness and short amplicon size, both reducing NGS library prep efficiency.

Samples were submitted to the Mayo Clinic Genomics Core for NGS library preparation and sequencing. In short, a total of 500ng of equimolarly pooled LR-PCR products per patient were sheered to ~150-200bp fragments using the Covaris E220 system and prepped for Illumina HiSeq2500 rapid 101bp-PE sequencing using the NEBNext DNA Library Prep kit (NEB). A total of 37 indexed samples were pooled per HiSeq2500 lane to achieve an expected average read depth of 5000x high quality reads (GQ>20) per base pair (actual: 4940x $\pm$ 2117x; GQ: 92 $\pm$ 27).

## Supplemental Figures

**Figure S1. Analysis of two false positive “mosaic” PKD1 families.** (A) Pedigree of family M796. (B) SS shows only a low level of the variant allele in the mother (II-2), including in a kidney tissue sample (II-2 (T)), and the daughter (III-1). (C) Analysis by tNGS shows approximately equal read counts for the normal and variant allele. (D) Pedigree of family P1317. (E) Analysis by tNGS in the mother (II-1) shows that only 7.9% of reads had the duplicated allele, suggesting mosaicism. (F) However, SS shows a similar sequence profile in the mother and affected daughter (III-2), with approximate equal peak height between the normal and variant alleles.

Fig S1

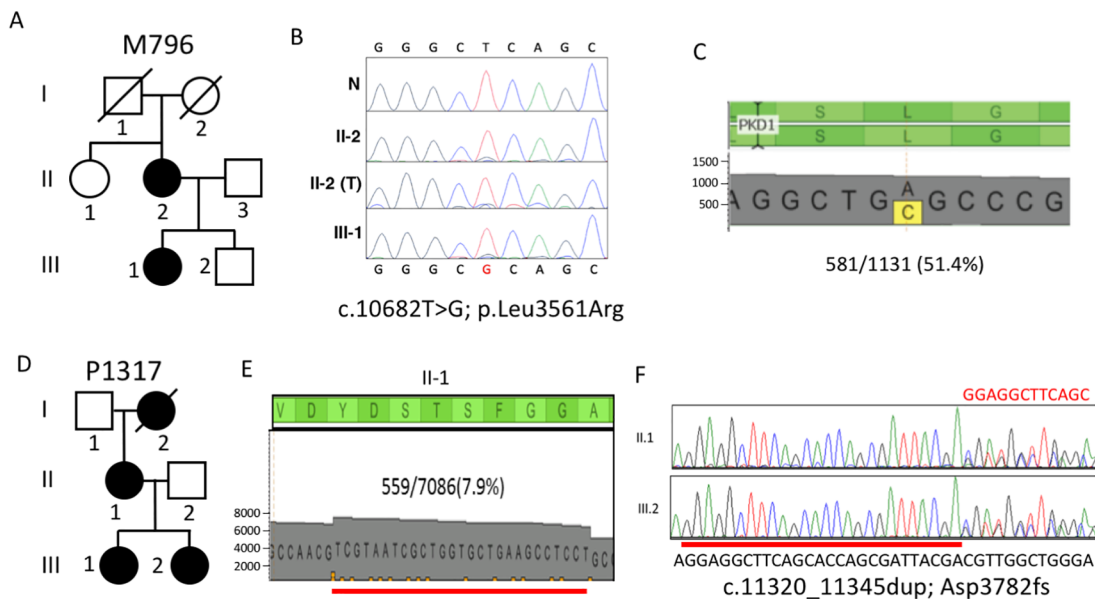

**Figure S2. Details of mosaic positive PKD1 families.** (A) MRI of 690020 III-1 with the fully penetrant mutation showing moderate PKD. (B) AS-PCR showing amplification in the mosaic patient, 870348, II-2, but not the normal (N) control. (C) SS (reverse strand shown) of the breakpoint fragment from IVS6 to IVS7 in 790057 II-2, compared to normal IVS7 sequence. (D) Log2 CNV analysis from the tNGS of 590039 II-4 blood and tissue derived DNA showing reduced signal from exons 2-9, consistent with being mosaic for a deletion. \* indicates significantly reduced signal ( $p < 0.05$ ). (E) SS of the IVS1-IVS9 breakpoint fragment in 590039 II-4. (F) SS of the AS-PCR product in M1312 II-2 showing the TG insertion. (G) SS of AS-PCR product from 290084 II-7 compared to normal sequence showing substitution of the last nucleotide of exon 8. This substitution, c.1722G>T, is predicted to result in loss of the IVS8 donor site (BDGP: Splice Site Predictions 0.56 to  $< 0.01$ ). The percentage of the observed versus the expected level of the PAL is indicated next to the radiological image.

Fig S2

**A**

690020: III-1, 42y, MRI: PAL = 100%

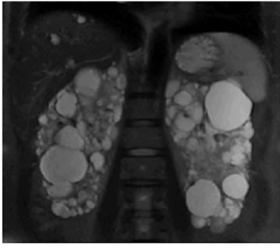

**B**

870348

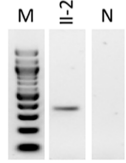

AS-PCR

**C**

790057

IVS7

G C A G G G G C C T G A G A C G C T

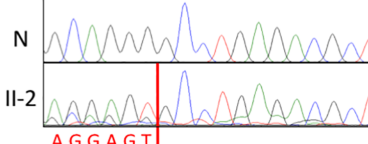

IVS6

IVS7

**D**

590039 II-4: blood DNA Log2 CNV

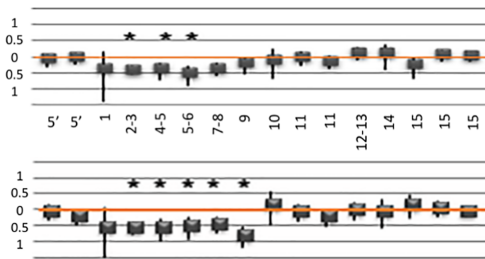

590039 II-4 tissue DNA Log2 CNV

**E**

IVS1

IVS9

A C C C A G C C C G C A G C A C T G G G

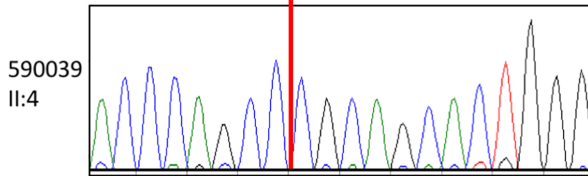

c.215+8043\_1850-141del11667bp, p.Leu72fs

**F**

AS-PCR: M1312

c.5352\_5353insTG; p.Asn1785\*

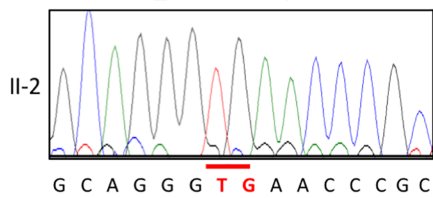

**G**

AS-PCR: 290084

Ex8 IVS8

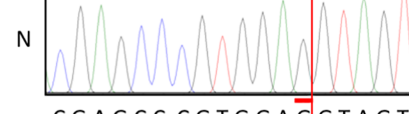

C G A G C C C G T G G A G G T A G T

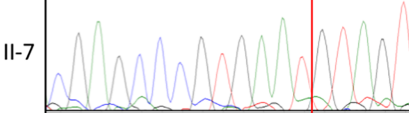

C G A G C C C G T G A A T G T A G T

c.1722G>T; p.Glu574Asp

**H**

M174: II-1

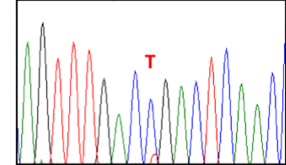

A G T T T G A C C G A C T C A A C

c.12682C>T, p.Arg4228\*

## **Supplemental Tables**

Table S1. Genes included on the 137 gene panel

| gene        | chromosome | gene        | chromosome | gene     | chromosome |
|-------------|------------|-------------|------------|----------|------------|
| AHI1        | chr6       | ERO1LB      | chr1       | PMM2     | chr16      |
| ALG8        | chr11      | FLCN        | chr17      | PRKAR1A  | chr17      |
| ALG9        | chr11      | FLNC        | chr7       | PRKCSH   | chr19      |
| ANKS6       | chr9       | GANAB       | chr11      | PTHB1    | chr7       |
| ARL13B      | chr3       | GATA3       | chr10      | REN      | chr1       |
| ARL6        | chr3       | GLA         | chrX       | RPGRIP1L | chr16      |
| ATF6B       | chr6       | GLIS2       | chr16      | RPN1     | chr3       |
| ATP2A2      | chr12      | HIVEP1      | chr6       | RPN2     | chr20      |
| ATXN10      | chr22      | HNF1B       | chr17      | SEC13    | chr3       |
| B9D1        | chr17      | HSP90B1     | chr12      | SEC24B   | chr4       |
| B9D2        | chr19      | HSPA5       | chr9       | SEC24C   | chr10      |
| BBIP1/BBS18 | chr10      | HYOU1       | chr11      | SEC31A   | chr4       |
| BBS1        | chr11      | IFT122      | chr3       | SEC61A1  | chr3       |
| BBS10       | chr12      | IFT140      | chr16      | SEC61A2  | chr10      |
| BBS12       | chr4       | IFT172      | chr2       | SEC61B   | chr9       |
| BBS2        | chr16      | IFT27/BBS19 | chr22      | SEC61G   | chr7       |
| BBS4        | chr15      | IFT43       | chr14      | SEC62    | chr3       |
| BBS5        | chr2       | IFT80       | chr3       | SEC63    | chr6       |
| BBS7        | chr4       | INPP5E      | chr9       | SIL1     | chr5       |
| BICC1       | chr10      | INVS        | chr9       | SPIN4    | chrX       |
| CALR        | chr19      | IQCB1       | chr3       | STT3A    | chr11      |
| CANX        | chr5       | KIF7        | chr15      | STT3B    | chr3       |
| CC2D2A      | chr4       | LRP2        | chr2       | TCTN1    | chr12      |
| CEP290      | chr12      | LRP5        | chr11      | TCTN2    | chr12      |
| CEP41       | chr7       | LZTFL1      | chr3       | TMEM138  | chr11      |
| CKAP4       | chr12      | MAPKBP1     | chr15      | TMEM216  | chr11      |
| COL4A1      | chr13      | MKKS        | chr20      | TMEM231  | chr16      |
| COL4A2      | chr13      | MKS1        | chr17      | TMEM237  | chr2       |
| COL4A4      | chr2       | MLEC        | chr12      | TMEM260  | chr14      |
| COL4A5      | chrX       | MOGS        | chr2       | TMEM67   | chr8       |
| CSPP1       | chr8       | MSTN        | chr2       | TRIM21   | chr11      |
| DDOST       | chr1       | MUC1        | chr1       | TRIM32   | chr9       |
| DNAJB11     | chr3       | NEK1        | chr4       | TSC1     | chr9       |
| DNAJB9      | chr7       | NEK8        | chr17      | TSC2     | chr16      |
| DNAJC1      | chr10      | NOTCH2      | chr1       | TTC21B   | chr2       |
| DNAJC10     | chr2       | NPHP1       | chr2       | TTC8     | chr14      |
| DNAJC3      | chr13      | NPHP10/BB1f | chr1       | UGGT1    | chr2       |
| DYNC2H1     | chr11      | NPHP3       | chr3       | UGGT2    | chr13      |
| DZIP1L      | chr3       | NPHP4       | chr1       | UMOD     | chr16      |
| EDEM1       | chr3       | NRIP1       | chr21      | VHL      | chr3       |
| EDEM2       | chr20      | OFD1        | chrX       | WDR19    | chr4       |
| EDEM3       | chr1       | OS9         | chr12      | WDR34    | chr9       |
| EFCAB7      | chr1       | PDIA3       | chr15      | WDR35    | chr2       |
| EIF2AK3     | chr2       | PKD1        | chr16      | XPNPEP3  | chr22      |
| ERLEC1      | chr2       | PKD2        | chr4       | ZNF423   | chr16      |
| ERO1A       | chr14      | PKHD1       | chr6       |          |            |

**Table S2: Mean read counts for the exonic regions of PKD1 and PKD2 by the 65 and 137 gene panel**

| Gene        | Exons          | Covered Region (GRCh37p.13) | 65 Gene Panel Mean DP | 137 Gene Panel Mean DP |
|-------------|----------------|-----------------------------|-----------------------|------------------------|
| <b>PKD2</b> | <b>Overall</b> |                             | <b>474.83</b>         | <b>779.45</b>          |
| PKD2        | 5'UTR-Exon 1   | chr4:88926749-88929530      | 70.56                 | 449.89                 |
| PKD2        | Exon 2         | chr4:88940560-88940773      | 705.08                | 834.74                 |
| PKD2        | Exon 3         | chr4:88957322-88957555      | 562.12                | 964.30                 |
| PKD2        | Exon 4         | chr4:88959353-88959703      | 877.89                | 1089.71                |
| PKD2        | Exon 5         | chr4:88964335-88964659      | 791.16                | 887.50                 |
| PKD2        | Exon 6         | chr4:88967744-88968072      | 715.65                | 775.61                 |
| PKD2        | Exon 7         | chr4:88973093-88973360      | 592.46                | 813.24                 |
| PKD2        | Exon 8         | chr4:88977188-88977469      | 663.49                | 900.37                 |
| PKD2        | Exon 9         | chr4:88979085-88979305      | 567.68                | 810.83                 |
| PKD2        | Exon 10        | chr4:88983008-88983206      | 530.35                | 863.93                 |
| PKD2        | Exon 11        | chr4:88986476-88986697      | 620.27                | 896.70                 |
| PKD2        | Exon 12        | chr4:88986864-88987081      | 752.25                | 1012.79                |
| PKD2        | Exon 13        | chr4:88989000-88989263      | 836.50                | 1072.94                |
| PKD2        | Exon 14        | chr4:88995914-88996161      | 808.74                | 898.91                 |
| PKD2        | Exon 15-3'UTR  | chr4:88996560-88998981      | 616.91                | 972.69                 |
| <b>PKD1</b> | <b>Overall</b> |                             | <b>839.24</b>         | <b>618.89</b>          |
| PKD1        | 5'UTR- Exon 1  | chr16:2185426-2187949       | 8.86                  | 343.90                 |
| PKD1        | Exon 2         | chr16:2169258-2169429       | 1460.35               | 1038.55                |
| PKD1        | Exon 3         | chr16:2169065-2169236       | 764.28                | 783.20                 |
| PKD1        | Exon 4         | chr16:2168627-2168896       | 1256.79               | 1076.63                |
| PKD1        | Exon 5         | chr16:2167742-2168513       | 1546.18               | 755.89                 |
| PKD1        | Exon 6         | chr16:2167440-2167723       | 1250.75               | 782.75                 |
| PKD1        | Exon 7         | chr16:2166784-2167104       | 915.91                | 468.73                 |
| PKD1        | Exon 8         | chr16:2166480-2166695       | 854.62                | 327.74                 |
| PKD1        | Exon 9         | chr16:2165943-2166169       | 1036.80               | 585.10                 |
| PKD1        | Exon 10        | chr16:2165329-2165676       | 1099.17               | 454.81                 |
| PKD1        | Exon 11        | chr16:2164121-2164976       | 917.00                | 527.45                 |
| PKD1        | Exon 12        | chr16:2163112-2163343       | 791.74                | 521.77                 |
| PKD1        | Exon 13        | chr16:2162739-2163014       | 1036.37               | 831.14                 |
| PKD1        | Exon 14        | chr16:2162291-2162524       | 891.99                | 553.96                 |
| PKD1        | Exon 15        | chr16:2158203-2161922       | 991.00                | 707.27                 |
| PKD1        | Exon 16        | chr16:2157834-2158083       | 971.60                | 769.85                 |
| PKD1        | Exon 17        | chr16:2156756-2156999       | 773.23                | 566.16                 |
| PKD1        | Exons 18-20    | chr16:2155816-2156728       | 1039.77               | 746.21                 |
| PKD1        | Exon 21        | chr16:2155273-2155525       | 927.83                | 564.96                 |
| PKD1        | Exon 22        | chr16:2154449-2154693       | 1167.33               | 821.50                 |
| PKD1        | Exon 23        | chr16:2153217-2153946       | 940.95                | 542.39                 |
| PKD1        | Exon 24        | chr16:2152765-2153021       | 853.86                | 590.50                 |
| PKD1        | Exon 25        | chr16:2152332-2152684       | 1040.17               | 931.82                 |
| PKD1        | Exon 26        | chr16:2152012-2152307       | 1112.61               | 819.86                 |
| PKD1        | Exons 27-30    | chr16:2149595-2150617       | 1003.20               | 590.99                 |
| PKD1        | Exons 31-32    | chr16:2147679-2148035       | 1012.95               | 750.22                 |
| PKD1        | Exons 33-34    | chr16:2147099-2147554       | 959.05                | 757.81                 |
| PKD1        | Exons 35-37    | chr16:2143495-2144261       | 929.89                | 624.54                 |
| PKD1        | Exon 38        | chr16:2142905-2143144       | 857.67                | 762.70                 |
| PKD1        | Exon 39        | chr16:2142431-2142643       | 887.87                | 908.92                 |
| PKD1        | Exon 40        | chr16:2141998-2142239       | 918.45                | 658.07                 |
| PKD1        | Exon 41        | chr16:2141732-2141957       | 958.96                | 736.30                 |
| PKD1        | Exon 42        | chr16:2141374-2141648       | 181.48                | 54.23                  |
| PKD1        | Exons 43-3'UTR | chr16:2138661-2141225       | 687.13                | 570.26                 |



Table S3. Details of the *PKD1* pathogenic variants detected in the 20 mosaic families

| Designation                  |                        | Variant type   | Mutation Strength Group (MSG) | Pub.              | gnomAD   | ACMG class | ACMG evidence            |
|------------------------------|------------------------|----------------|-------------------------------|-------------------|----------|------------|--------------------------|
| Nucleotide                   | Amino acid             |                |                               |                   |          |            |                          |
| c.74_75delGCinsT             | p.(Gly25fs)            | Frameshift     | 1                             | N                 | 0        | Path       | PVS1, PM2, PM6, PP4      |
| c.215+8043_1850-141del11.7kb | p.(Leu72fs)            | Large deletion | 1                             | N                 | 0        | Path       | PVS1, PM2, PM6, PP4      |
| c.844_845dupGG               | p.(Pro283fs)           | Frameshift     | 1                             | N                 | 0        | Path       | PVS1, PM2, PM6, PP4      |
| c.935_937delinsA             | p.(Ala312fs)           | Frameshift     | 1                             | N                 | 0        | Path       | PVS1, PM2, PP1, PM6, PP4 |
| c.1386-34_1606+26del282bp    | p.(Ser463fs)           | Frameshift     | 1                             | N                 | 0        | Path       | PVS1, PM2, PM6, PP4      |
| c.1722G>T                    | p.(Glu574?)            | Splicing       | 2                             | N                 | 0        | L. Path    | PM2, PP3, PM6, PP4       |
| c.2548_2557del               | p.(Asp850fs)           | Frameshift     | 1                             | N                 | 0        | Path       | PVS1, PM2, PP1, PM6, PP4 |
| c.3685delG                   | p.(Val1229fs)          | Frameshift     | 1                             | N                 | 0        | Path       | PVS1, PM2, PM6, PP4      |
| c.4520G>A                    | p.(Trp1507*)           | Nonsense       | 1                             | 1x <sup>S1</sup>  | 0        | Path       | PVS1, PM2, PM6, PP4      |
| c.5352_5353insTG             | p.(Asn1785*)           | Frameshift     | 1                             | N                 | 0        | Path       | PVS1, PM2, PM6, PP4      |
| c.8426C>T                    | p.(Pro2809Leu)         | Missense       | 2                             | 1x <sup>S1</sup>  | 0        | L. Path    | PM2, PS1, PM6, PP4       |
| c.8970_8972del               | p.(Tyr2991del)         | Inframe indel  | 1                             | N                 | 0        | L. Path    | PM2, PP3, PP1, PM6, PP4  |
| c.9185_9201+7del24           | p.(Val3062fs)          | Frameshift     | 1                             | N                 | 0        | Path       | PVS1, PM2, PM6, PP4      |
| c.10373_10386del14           | p.(Pro3458fs)          | Frameshift     | 1                             | N                 | 0        | Path       | PVS1, PM2, PS2, PP4      |
| c.10922dupC                  | p.(Arg3642fs)          | Frameshift     | 1                             | N                 | 0        | Path       | PVS1, PM2, PM6, PP4      |
| c.11157-2A>G                 | p.(Arg3719?)           | Splicing       | 1                             | N                 | 0        | Path       | PVS1, PM2, PS1, PM6, PP4 |
| c.11379delG                  | p.(Thr3794fs)          | Frameshift     | 1                             | 8x <sup>S1</sup>  | 0        | Path       | PVS1, PS4, PM6, PP4      |
| c.11654_11683del             | p.(Val3885_Ser3894del) | Inframe indel  | 2                             | N                 | 0        | L. Path    | PM4, PM2, PP1, PM6, PP4  |
| c.12440_12443dup             | p.(Phe4149fs)          | Frameshift     | 1                             | N                 | 0        | Path       | PVS1, PM2, PP1, PM6, PP4 |
| c.12682C>T                   | p.(Arg4228*)           | Nonsense       | 1                             | 11x <sup>S1</sup> | 1/244928 | path       | PVS1, PS4, PM6, PP4      |

MSG1, truncating, 2 and 3, predicted strongly and weakly penetrant nontruncating, respectively; Pub., Prior description in publication; frequency in the gnomAD database of “normal individuals”; ACMG Class, Pathogenic classification based on the American College of Medical Genetics guidelines for interpretation of sequence variants: Path, pathogenic, L. Path, likely pathogenic; ACMG evidence, evidence supporting the interpretation of sequence variant classification. The evidence is classed as: PVS, pathogenic very strong; PS, pathogenic strong, PM, pathogenic moderate; PP, pathogenic supportive (see Richards et. al.<sup>S2</sup> for details)

S1. Autosomal Dominant Polycystic Kidney Disease Mutation Database (<https://pkdb.mayo.edu/>), 2019

S2. Richards S, Aziz N, Bale S, et al. Standards and guidelines for the interpretation of sequence variants: a joint consensus recommendation of the American College of Medical Genetics and Genomics and the Association for Molecular Pathology. *Genet Med* 2015; **17**: 405-424.

**Table S4. Details of primers used for amplification of PKD1 and PKD2 for the LR-NGS protocol**

| Primer Name            | Sequence (red nt denotes mismatch with pseudogenes) | Pair amplicon length | Amplicon Start (hg19) | Amplicon End (hg19) |
|------------------------|-----------------------------------------------------|----------------------|-----------------------|---------------------|
| NGS_PKD1_5UTR-1_F      | CGCAGCCTTACCATCCACCT                                | 2277nt               | chr16:2185030         | Chr16:2187307       |
| NGS_PKD1_5UTR-1_R      | TCATCGCCCTTCCTAAGCA                                 |                      |                       |                     |
| NGS_PKD1_2s-12m_NH2_F  | CTCTGTCTACTCACCTCCGCATC                             | 8576nt               | chr16:2163055         | chr16:2171630       |
| NGS_PKD1_2s-12m_NH2_R  | AGCGTCCTCGGGCAGCATGAAG                              |                      |                       |                     |
| NGS_PKD1_13s-21s_NH2_F | TGAGTGGAGGGAGGGACGCtAAT                             | 7901nt               | chr16:2155151         | chr16:2163040       |
| NGS_PKD1_13s-21s_NH2_R | GACAGAACGGCTGAGGCTACTG                              |                      |                       |                     |
| NGS_PKD1_22m-34s_NH2_F | GGGGGTCCAGTCAAGTGGG                                 | 7776nt               | chr16:2146917         | chr16:2154774       |
| NGS_PKD1_22m-34s_NH2_R | CCTACAAAGCCCCATGAGCC                                |                      |                       |                     |
| NGS_PKD1_35-3UTR_NH2_F | ACGCCTGACTTCGGTGCCTGGAGTG                           | 5891 nt              | Chr16:2138530         | chr16:2144420       |
| NGS_PKD1_35-3UTR_NH2_R | AGCCGAGCCCACACCTGGCTATGAG                           |                      |                       |                     |
|                        |                                                     |                      |                       |                     |
| NGS_PKD2_5UTR-1_NH2_F  | CTTCAGCTTCAGAAGTTCCTTGGATGAC                        | 4112nt               | Chr4:88926589         | chr4:88930700       |
| NGS_PKD2_5UTR-1_NH2_R  | ATTCTCCCAAAGAGTCAAGTCTAAGCG                         |                      |                       |                     |
| NGS_PKD2_2_F           | AAGAATCATGGCTGTTCTTAGTGCC                           | 2855nt               | chr4:88938934         | chr4:88941789       |
| NGS_PKD2_2_R           | AAACTGCTTCCTCATCTGTTCTCGTG                          |                      |                       |                     |
| NGS_PKD2_3-5_F         | GAGAGGTGGTGGAAGATGAAATCGAG                          | 8082nt               | chr4:88957044         | chr4:88965126       |
| NGS_PKD2_3-5_R         | CCAGGATCTGTGGAAGGAACCTTACG                          |                      |                       |                     |
| NGS_PKD2_5-7_F         | TTGGCTGTAATTTCTCTGGGGAC                             | 9951nt               | chr4:88964001         | chr4:88973952       |
| NGS_PKD2_5-7_R         | TGCTCCTCCCTCTCTTTCTCTAAG                            |                      |                       |                     |
| NGS_PKD2_8-10_NH2_F    | CACTAACTCCCAATCCCCCAGTCC                            | 6461 nt              | chr4:88976965         | chr4:88983425       |
| NGS_PKD2_8-10_NH2_R    | TGAACCTTCAGCTCAGCTCTTAAAGTGTC                       |                      |                       |                     |
| NGS_PKD2_11-13_NH2_F   | GCAATCCAGCCAGGTGACAGGGTAAGAC                        | 4710nt               | chr4:88985270         | chr4:88989979       |
| NGS_PKD2_11-13_NH2_R   | CGTGAATACCACATCTAGGCACATCTAAG                       |                      |                       |                     |
| NGS_PKD2_14-3UTR_F     | CTTTTGTAAACAAGAGTGGGAAAGCCG                         | 5109nt               | chr4:88994370         | Chr4:88999479       |
| NGS_PKD2_14-3UTR_R     | ATCTACCAGTGTCTGCATTTCTTTGCCT                        |                      |                       |                     |

Table S5. Primers and conditions for AS-PCR

| Primer ID       | 5'---3' sequence           | Tm (°C) | Product size (bp) |
|-----------------|----------------------------|---------|-------------------|
| 290084_F        | CCGCACGAGCCCGTGAAT         | 70      | 114               |
| 290084_R        | CCCCAAGTTTTTTGGCGAGACCCAC  |         |                   |
| M1312_INSTG_F   | ACTTGGTCACCATGACGGCAGGGTGA | 70      | 627               |
| M1312_Ex15(5)_R | GGGTTGGCCCCGCCGACCTGC      |         |                   |
| 870348DEL10_F   | CTTGGTGCTCCAGGTGCCAA       | 60      | 311               |
| 870348DEL10_R   | ACTAGGACTCCCTGCAGTACAC     |         |                   |
| M174_F          | CTGCTACCCAGTTTGACT         | 60      | 336               |
| M174_R          | AACCTACGTGCAGCCATTCT       |         |                   |
| 390010_DEL30_F  | ACCAGCCAGGAGCCCACCCTCGCT   | 72      | 259               |
| 390010_DEL30_R  | AGCGAGAGGCCCGCGCTGAGGGC    |         |                   |
